# Supplementary material for: SARS-CoV-2 Infection Alters the Phenotype and Gene Expression of Adipocytes
Source: MDPI journal article supplement (doi:10.3390/ijms25042086), 2024-02-08
Supplement: s1 [file s1]

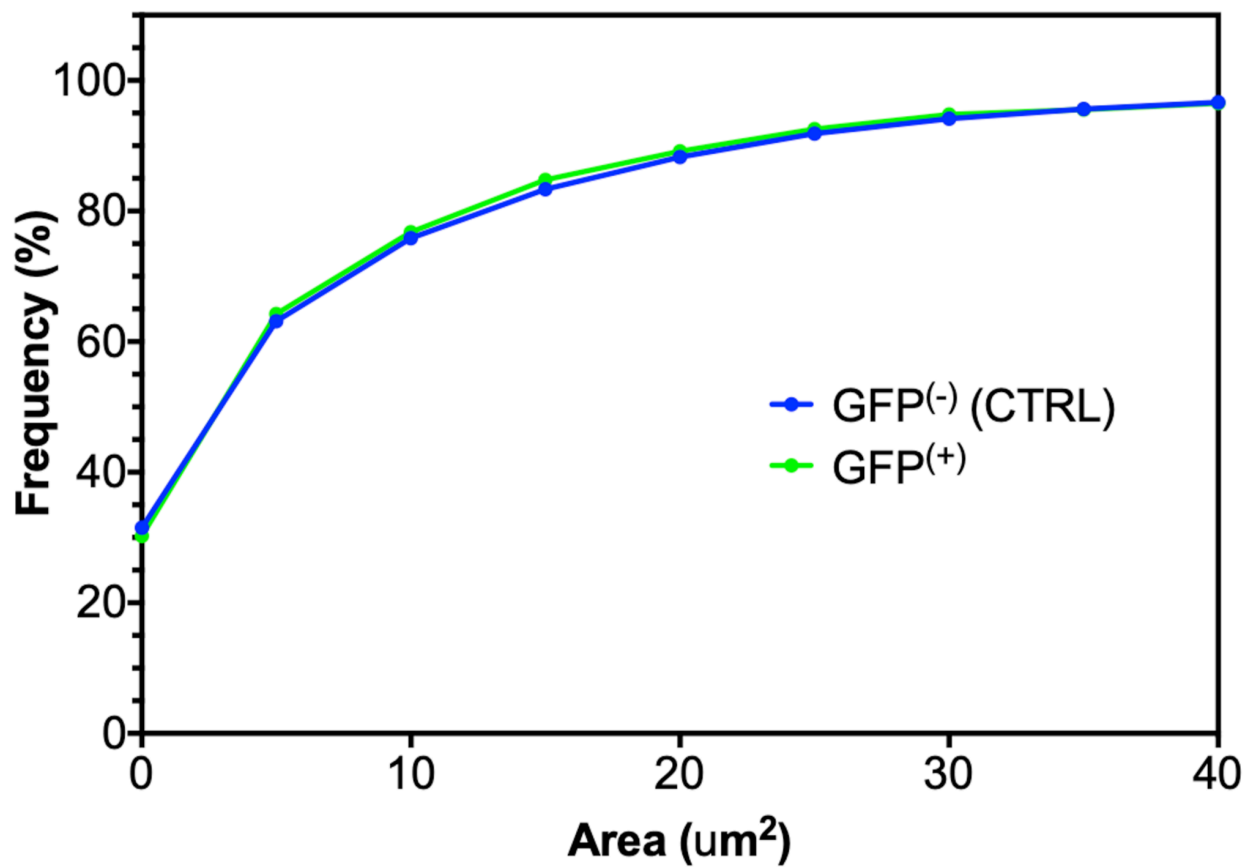

**Supplementary Figure S1. Exogenous expression of EGFP protein in SGBS adipocytes does not induce enlargement of LDs as revealed by confocal microscopy**

Frequency cumulative distribution of LD areas in in GFP(-) (CTRL) and GFP(+) cells; the cumulative distributions did not resulted statistically different ( $p=0.6694$ ) as assessed by the Kolmogorov-Smirnov test.
